# Supplementary material for: Probing inhibition mechanisms of adenosine deaminase by using molecular dynamics simulations
Source: PubMed Central journal article supplement (PMC6239307; doi:10.1371/journal.pone.0207234), 2018-11-16

**S4 Fig.** The RMSD of C- $\alpha$  of the second time MD simulation. (a) RMSD of ADA, ADA-FR0 and ADA-FR2; (b) RMSD of ADA-PRH and ADA (without PRH).

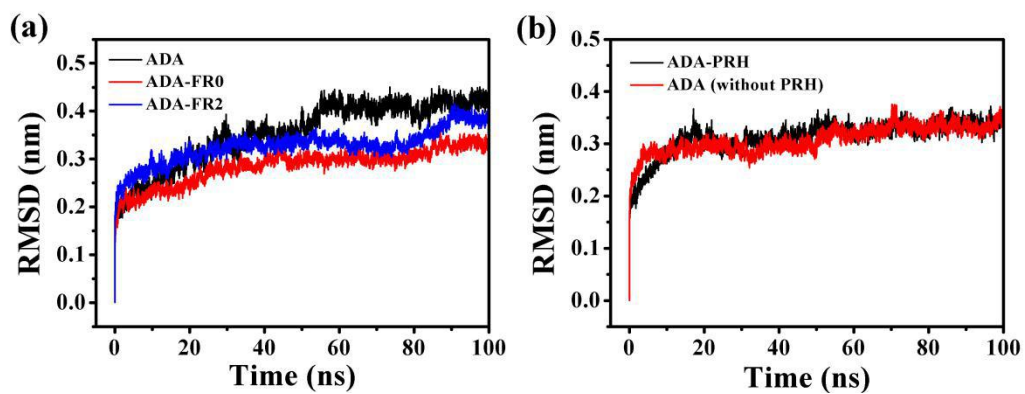

Supplement: pone.0207234.s004.pdf [file pone.0207234.s004.pdf]
