# Supplementary material for: Probing inhibition mechanisms of adenosine deaminase by using molecular dynamics simulations
Source: PubMed Central journal article supplement (PMC6239307; doi:10.1371/journal.pone.0207234), 2018-11-16

**S5 Fig. The difference of secondary structure of ADA in the three systems: ADA, ADA-FR2 and ADA-FR0.**

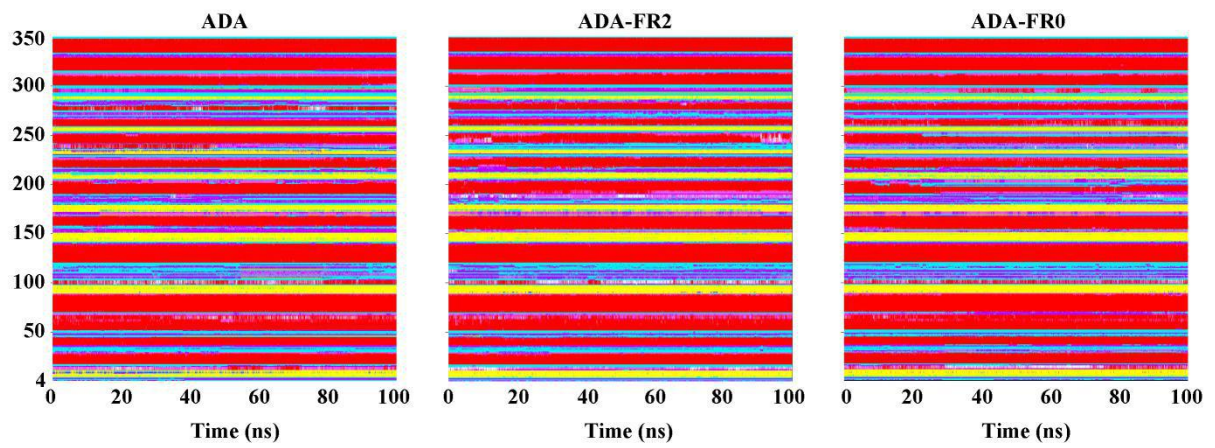

Supplement: pone.0207234.s005.pdf [file pone.0207234.s005.pdf]
