# Supplementary material for: Probing inhibition mechanisms of adenosine deaminase by using molecular dynamics simulations
Source: PubMed Central journal article supplement (PMC6239307; doi:10.1371/journal.pone.0207234), 2018-11-16

**S6 Fig. The difference of secondary structure of ADA in the two systems: ADA-PRH and ADA (without PRH).**

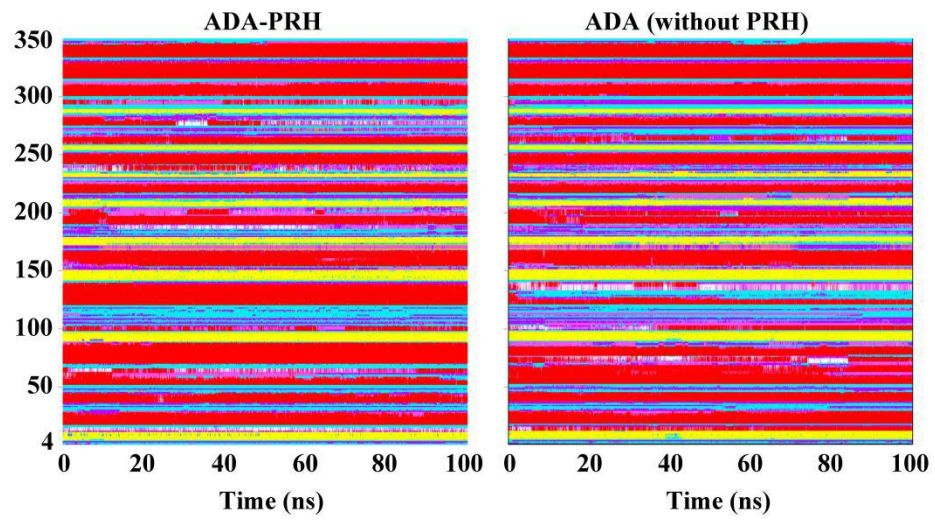

Supplement: pone.0207234.s006.pdf [file pone.0207234.s006.pdf]
