# Supplementary material for: Probing inhibition mechanisms of adenosine deaminase by using molecular dynamics simulations
Source: PubMed Central journal article supplement (PMC6239307; doi:10.1371/journal.pone.0207234), 2018-11-16
Supplement: pone.0207234.s007.pdf [file pone.0207234.s007.pdf]

**S1 Table. Composition of five systems.**

| System            | Protein | Ligand | Ions    | SOL   |
|-------------------|---------|--------|---------|-------|
| ADA               | 1       | None   | Na (9)  | 14280 |
| ADA-FR0           | 1       | FR0    | Na (10) | 10555 |
| ADA-FR2           | 1       | FR2    | Na (10) | 10916 |
| ADA-PRH           | 1       | PRH    | Na (11) | 9654  |
| ADA (without PRH) | 1       | None   | Na (11) | 14475 |
